# Supplementary material for: Inhibitory Control, but Not Prolonged Object-Related Experience Appears to Affect Physical Problem-Solving Performance of Pet Dogs
Source: PubMed Central journal article supplement (PMC4749342; doi:10.1371/journal.pone.0147753), 2016-02-10
Supplement: pone.0147753.s001.pdf [file pone.0147753.s001.pdf]

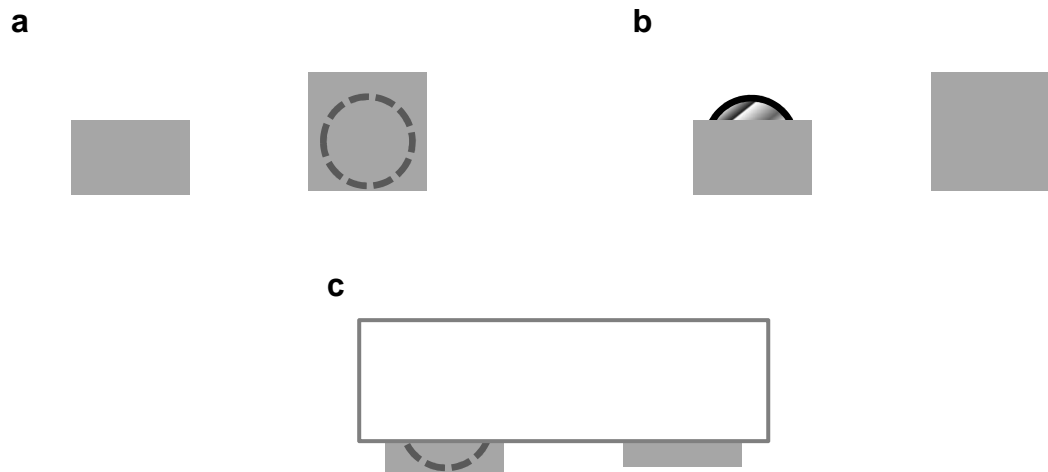

**S1 Fig. Conditions of the size constancy task. a)** occluded condition, **b)** semi-occluded condition, **c)** control condition.
