# Supplementary material for: Inhibitory Control, but Not Prolonged Object-Related Experience Appears to Affect Physical Problem-Solving Performance of Pet Dogs
Source: PubMed Central journal article supplement (PMC4749342; doi:10.1371/journal.pone.0147753), 2016-02-10
Supplement: pone.0147753.s002.pdf [file pone.0147753.s002.pdf]

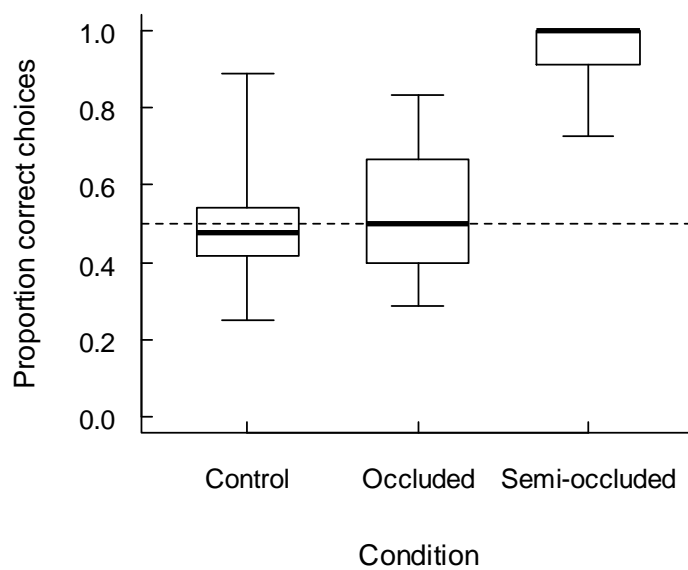

**S2 Fig. Proportion of correct choices for the three conditions in the size constancy task.** Boxplots indicate median, inter-quartile range and range. The dashed line indicates chance level.
