# Supplementary material for: Inhibitory Control, but Not Prolonged Object-Related Experience Appears to Affect Physical Problem-Solving Performance of Pet Dogs
Source: PubMed Central journal article supplement (PMC4749342; doi:10.1371/journal.pone.0147753), 2016-02-10
Supplement: pone.0147753.s004.pdf [file pone.0147753.s004.pdf]

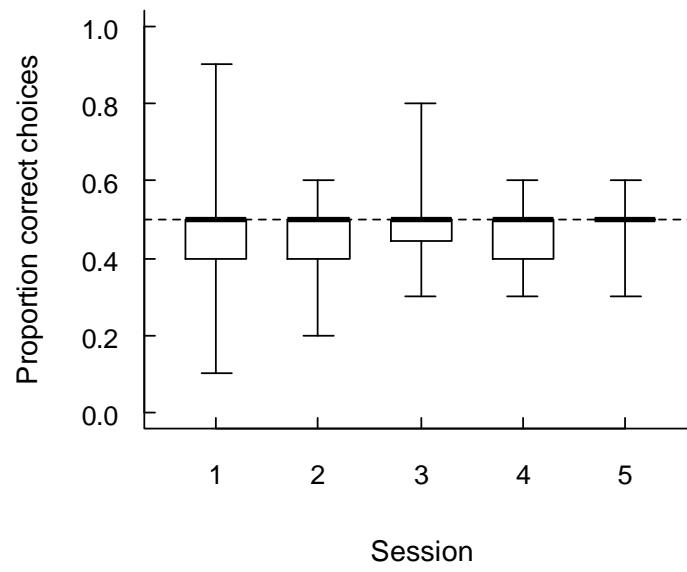

**S4 Fig. Proportion of correct choices for the five sessions of the trap-tube task.** Boxplots indicate median, inter-quartile range and range. The dashed line indicates chance level.
