# Supplementary material for: Inhibitory Control, but Not Prolonged Object-Related Experience Appears to Affect Physical Problem-Solving Performance of Pet Dogs
Source: PubMed Central journal article supplement (PMC4749342; doi:10.1371/journal.pone.0147753), 2016-02-10
Supplement: pone.0147753.s015.pdf [file pone.0147753.s015.pdf]

**S2 Table. Scoring of inhibitory control tasks in videos of final sessions.**

|                           |         |                                                                                                                                                                             |
|---------------------------|---------|-----------------------------------------------------------------------------------------------------------------------------------------------------------------------------|
| “Wait-for-treat”          | Score 2 | Waited for “go” command after at least 5 s with treat placed within 10 cm of one of the front paws in the first two trials OR in at least three of four consecutive trials. |
|                           | Score 1 | Waited for at least 5 s in one or two of four trials                                                                                                                        |
|                           | Score 0 | Never waited for at least 5 s                                                                                                                                               |
| “Middle cup” <sup>1</sup> | Score 2 | Successful in four consecutive trials (at least two of them with the middle cup left empty) OR no more than one mistake in six consecutive trials                           |
|                           | Score 1 | More than 1 mistake in 6 consecutive trials but with a least one success when the middle cup was left unbaited                                                              |
|                           | Score 0 | Never successful when the middle cup was left unbaited                                                                                                                      |
| “Leash” <sup>2</sup>      | Score 2 | At least one success for distance 2 m OR at least two successes for distance 1 m with no more than one failure.                                                             |
|                           | Score 1 | At least one success for distance 1 m and more than one failure.                                                                                                            |
|                           | Score 0 | No successes                                                                                                                                                                |

<sup>1</sup>Success: overturned the two baited cups first; mistake: overturned the unbaited cup before overturning one or both of the baited cups.

<sup>2</sup>Success: walked back and around the obstacle to reach the owner within 20 s; failure: failed to reach the owner within 20 s. Distance refers to the distance the dog had to move away from the owner in order to be able to reach him/her. If more than three trials were performed, only the first three were considered.
