# Supplementary material for: Inhibitory Control, but Not Prolonged Object-Related Experience Appears to Affect Physical Problem-Solving Performance of Pet Dogs
Source: PubMed Central journal article supplement (PMC4749342; doi:10.1371/journal.pone.0147753), 2016-02-10
Supplement: pone.0147753.s016.pdf [file pone.0147753.s016.pdf]

**S3 Table. Models testing for experience effects**

| Response variable                  | Predictor                              | Test statistic        | p value | coefficient | standard error |
|------------------------------------|----------------------------------------|-----------------------|---------|-------------|----------------|
| On-off (criterion reached Y/N)     | Treatment group                        | $\chi^2_{(2)} = 0.20$ | 0.90    |             |                |
|                                    | Treatment: Enriched                    |                       |         | 0.29        | 0.81           |
|                                    | Treatment: Manipulative                |                       |         | -0.08       | 0.88           |
| On-off (initial performance)       | Treatment group                        | $\chi^2_{(2)} = 0.09$ | 0.96    |             |                |
|                                    | Treatment: Enriched                    |                       |         | 0.002       | 0.17           |
|                                    | Treatment: Manipulative                |                       |         | -0.05       | 0.19           |
| Size constancy (all trials)        | Treatment group                        | $\chi^2_{(2)} = 1.89$ | 0.39    |             |                |
|                                    | Treatment: Enriched                    |                       |         | -0.32       | 0.25           |
|                                    | Treatment: Manipulative                |                       |         | -0.28       | 0.27           |
| Size constancy (all trials) (GLMM) | Treatment group * Half of trials       | $\chi^2_{(2)} = 2.43$ | 0.30    |             |                |
|                                    | Treatment: Enriched * Half: Second     |                       |         | -0.18       | 0.49           |
|                                    | Treatment: Manipulative * Half: Second |                       |         | 0.67        | 0.57           |
| On-off (initial performance)       | String-pulling (initial performance)   | $\chi^2_{(1)} = 0.01$ | 0.93    | 0.01        | 0.08           |
| On-off (initial performance)       | String-pulling (criterion reached Y/N) | $\chi^2_{(1)} = 0.08$ | 0.78    | 0.08        | 0.27           |
| On-off (criterion reached Y/N)     | String-pulling (criterion reached Y/N) | $\chi^2_{(1)} = 1.42$ | 0.23    | 1.10        | 0.96           |
