# Supplementary material for: Inhibitory Control, but Not Prolonged Object-Related Experience Appears to Affect Physical Problem-Solving Performance of Pet Dogs
Source: PubMed Central journal article supplement (PMC4749342; doi:10.1371/journal.pone.0147753), 2016-02-10
Supplement: pone.0147753.s017.pdf [file pone.0147753.s017.pdf]

**S4 Table. Models testing for effects of inhibitory control (inhibition score)**

| Response variable                     | Predictor                         | Test statistic         | p value | coefficient | standard error |
|---------------------------------------|-----------------------------------|------------------------|---------|-------------|----------------|
| On-off (criterion reached Y/N)        | Inhibition score                  | $\chi^2_{(1)} = 0.75$  | 0.39    | 0.21        | 0.25           |
| On-off (initial performance)          | Inhibition score                  | $\chi^2_{(1)} = 4.65$  | 0.03    | 0.11        | 0.05           |
| Size constancy (all trials)           | Inhibition score                  | $\chi^2_{(1)} = 4.00$  | 0.046   | -0.17       | 0.09           |
| Size constancy (all trials) (GLMM)    | Inhibition score * Half of trials | $\chi^2_{(1)} = 3.86$  | 0.049   | -0.34       | 0.17           |
| Size constancy: first half of trials  | Inhibition score                  | $\chi^2_{(1)} = 0.002$ | 0.97    | -0.005      | 0.12           |
| Size constancy: second half of trials | Inhibition score                  | $\chi^2_{(1)} = 7.88$  | 0.005   | -0.34       | 0.13           |
