# Supplementary material for: Inhibitory Control, but Not Prolonged Object-Related Experience Appears to Affect Physical Problem-Solving Performance of Pet Dogs
Source: PubMed Central journal article supplement (PMC4749342; doi:10.1371/journal.pone.0147753), 2016-02-10
Supplement: pone.0147753.s018.pdf [file pone.0147753.s018.pdf]

**S5 Table. Models testing for effects of inhibitory control (scores of the three inhibition tasks separately)**

| Response variable                     | Predictor                    | Test statistic        | p value | coefficient | standard error |
|---------------------------------------|------------------------------|-----------------------|---------|-------------|----------------|
| On-off (initial performance)          | Score of wait-for-treat task | $\chi^2_{(1)} = 2.53$ | 0.11    | 0.25        | 0.16           |
| On-off (initial performance)          | Score of middle cup task     | $\chi^2_{(1)} = 0.09$ | 0.76    | 0.03        | 0.08           |
| On-off (initial performance)          | Score of leash task          | $\chi^2_{(1)} = 10.6$ | 0.001   | 0.36        | 0.11           |
| Size constancy (all trials)           | Score of wait-for-treat task | $\chi^2_{(1)} = 0.84$ | 0.36    | -0.31       | 0.34           |
| Size constancy (all trials)           | Score of middle cup task     | $\chi^2_{(1)} = 3.46$ | 0.06    | -0.23       | 0.13           |
| Size constancy (all trials)           | Score of leash task          | $\chi^2_{(1)} = 0.48$ | 0.49    | -0.11       | 0.17           |
| Size constancy: second half of trials | Score of wait-for-treat task | $\chi^2_{(1)} = 1.53$ | 0.22    | -0.61       | 0.51           |
| Size constancy: second half of trials | Score of middle cup task     | $\chi^2_{(1)} = 8.45$ | 0.004   | -0.55       | 0.20           |
| Size constancy: second half of trials | Score of leash task          | $\chi^2_{(1)} = 1.30$ | 0.25    | -0.26       | 0.24           |

These models were only calculated for response variables where the overall inhibition score appeared as a significant predictor of performance (cf. S4 Table).
